# Supplementary material for: Development of a Protocol Using the Delphi Method for the ad interim Supply of Hormonal Contraceptives in Swiss Pharmacies
Source: MDPI journal article supplement (doi:10.3390/pharmacy10060168), 2022-12-02
Supplement: s1 [file s1]

# Abgabeprotokoll hormonelle Kontrazeptiva ohne ärztliche Verordnung

(im begründeten Ausnahmefall gemäss HMG)

|                           |  |
|---------------------------|--|
| Name & Vorname der Kundin |  |
| Geburtsdatum bzw. Alter   |  |

## I) Kurzabklärung

|                                                                                      |                                                                                                                                                                                                                                                              |
|--------------------------------------------------------------------------------------|--------------------------------------------------------------------------------------------------------------------------------------------------------------------------------------------------------------------------------------------------------------|
| 1. Was ist der Grund für die Abgabe von HK ohne ärztliche Verordnung (Rezept)?       | <input type="checkbox"/> Rezept abgelaufen am: _____<br><input type="checkbox"/> Rezept nicht dabei<br><input type="checkbox"/> HK werden sonst beim Arzt bezogen<br><input type="checkbox"/> Ausländisches Rezept<br><input type="checkbox"/> Andere: _____ |
| 2. a) Wurden HK innerhalb der letzten 2 Jahre von einem Arzt/einer Ärztin verordnet? | <input type="checkbox"/> Ja → weiter bei Frage 2b <input type="checkbox"/> Nein → ggf. Weiterleitung Arzt/Ärztin                                                                                                                                             |
| b) Welches Präparat nehmen Sie ein bzw. wenden Sie an?                               | Präparatename bzw. Wirkstoff(e): _____<br><input type="checkbox"/> KHK <input type="checkbox"/> Gestagenmonopräparat                                                                                                                                         |
| c) Wann haben Sie das Präparat zum letzten Mal eingenommen bzw. angewendet?          | Datum (evt. Uhrzeit): _____                                                                                                                                                                                                                                  |
| d) Vertragen Sie das Präparat gut?                                                   | <input type="checkbox"/> Ja <input type="checkbox"/> Nein _____<br>→ ggf. Weiterleitung Arzt/Ärztin                                                                                                                                                          |
| 3. Wann hat die letzte gynäkologische Routinekontrolle stattgefunden?                | Monat/Jahr: _____                                                                                                                                                                                                                                            |
| 4. a) Wann hat die letzte Periode begonnen?                                          | Datum: _____                                                                                                                                                                                                                                                 |
| b) Verlief die letzte Periode wie üblich?                                            | <input type="checkbox"/> Ja <input type="checkbox"/> Nein → ggf. Weiterleitung Arzt/Ärztin                                                                                                                                                                   |

### Erste Evaluation der Situation durch den Apotheker/die Apothekerin:

|                                                                       |                                                                                                                     |
|-----------------------------------------------------------------------|---------------------------------------------------------------------------------------------------------------------|
| 5. Kann eine SS mit grosser Wahrscheinlichkeit ausgeschlossen werden? | <input type="checkbox"/> Ja <input type="checkbox"/> Nein → ggf. Weiterleitung Arzt/Ärztin                          |
| 6. Ist eine ausführlichere Abklärung sinnvoll?                        | <input type="checkbox"/> Ja → weiter mit Abschnitt II <input type="checkbox"/> Nein → weiter mit Abschnitt III & IV |

Notizen:

## II) Ausführlichere Abklärung (im Bedarfsfall zusätzlich auszufüllen)

7. a) Treffen bei Ihnen eine oder mehrere der folgenden Situationen zu?

☐ Alter > 35 Jahre

☐ Rauchen

☐ Bluthochdruck

☐ Übergewicht

☐ Erhöhte Blutfettwerte

☐ Diabetes («Zuckerkrankheit»)

☐ Auftreten von einem Blutgerinnsel bei Ihnen oder einem Verwandten 1. Grades

☐ Thromboseneigung/  
Thrombophilie

☐ Migräne

☐ Geburt < 6 Wochen

☐ Stillzeit

☐ Nicht abgeklärte vaginale Blutungen

zutreffende Situation(en) ankreuzen

→ weiter bei Frage 7b

☐ Nein → Frage 8a

b) Wurde die Situation im Zusammenhang mit Ihrer Verhütungsmethode bereits mit einem Arzt/einer Ärztin besprochen?

☐ Ja

☐ Nein

→ ggf. Weiterleitung Arzt/Ärztin

8. a) Welche weiteren Arzneimittel nehmen Sie ein bzw. wenden Sie an?

☐

→ weiter bei Frage 8b

☐ Keine

→ weiter mit Abschnitt III

b) Evaluation der Arzneimittel durch Apotheker:in

CYP3A4-induzierende Arzneimittel:  
Relevante KI bzw. IA:

☐ Ja

☐ Nein

☐ Ja

☐ Nein

Notizen:

### III) Welche Informationen wurden der Kundin während des Gesprächs gegeben?

- ☐ Empfehlung für regelmässige gynäkologische Kontrollen, falls die letzte gyn. Untersuchung bereits mehr als 1 Jahr zurück liegt (Reevaluation der Verhütung, Brustuntersuchung, Krebsabstrich etc.)
- ☐ Informationen allgemein zum weiblichen Zyklus
- ☐ Informationen zum Wirkmechanismus von HK
- ☐ Produkteinformationen (z. B. Einnahmehinweise; wann kann die Wirksamkeit eingeschränkt sein, Massnahmen bei vergessener Pille etc.)
- ☐ Informationen über verschiedene Verhütungsmethoden (siehe z. B. Factsheet [www.sex-i.ch](http://www.sex-i.ch))
- ☐ Informationen zu sexuell übertragbaren Erkrankungen (siehe z. B. [www.lovelife.ch](http://www.lovelife.ch))
- ☐ Informationen zur Erkennung von Thrombosen/Embolien (siehe z. B. [Informationsblatt](#) der SGGG für Anwenderinnen von KHK)
- ☐ Weitere:

### IV) Dokumentation des Abgabeentscheids

|                            |                                                                                                    |                               |
|----------------------------|----------------------------------------------------------------------------------------------------|-------------------------------|
| Urteilsfähigkeit gegeben   | <input type="checkbox"/> Ja                                                                        | <input type="checkbox"/> Nein |
| Risiko / KI vorhanden?     | <input type="checkbox"/> Ja                                                                        | <input type="checkbox"/> Nein |
| Abgabe von HK              | <input type="checkbox"/> Ja; evt. Produkt & Packungsgrösse: <input type="checkbox"/> Nein<br>_____ |                               |
| Weiterleitung der Kundin   | <input type="checkbox"/> Ja; an: <input type="checkbox"/> Nein<br>_____                            |                               |
| Notizen                    |                                                                                                    |                               |
| Datum & Visum Apotheker:in |                                                                                                    |                               |
